# Supplementary material for: Exome Sequencing in BRCA1- and BRCA2-Negative Greek Families Identifies MDM1 and NBEAL1 as Candidate Risk Genes for Hereditary Breast Cancer
Source: PubMed Central journal article supplement (PMC6813924; doi:10.3389/fgene.2019.01005), 2019-10-18
Supplement: Presentation_1.pdf [file Presentation_1.pdf]

1 **Exome Sequencing in *BRCA1/2* Negative Greek Families**  
2 **Identifies *MDM1* and *NBEAL1* as Candidate Risk Genes for**  
3 **Hereditary Breast Cancer**

4  
5 Running title: Greek hereditary breast cancer candidates  
6

7  
8 Stavros Glentis<sup>1+</sup>, Alexandros C. Dimopoulos<sup>1</sup>, Konstantinos Rouskas<sup>1</sup>, George Ntritsos<sup>2</sup>,  
9 Evangelos Evangelou<sup>2,3</sup>, Steven Narod<sup>4,5</sup>, Anne-Marie Mes-Masson<sup>6</sup>, William D.  
10 Foulkes<sup>7,8,9</sup>, Barbara Rivera<sup>7,8</sup>, Patricia N. Tonin<sup>10</sup>, Jiannis Ragoussis<sup>7,11\*</sup>, Antigone S.  
11 Dimas<sup>1\*</sup>.  
12

13  
14 <sup>1</sup>Division of Molecular Biology and Genetics, Biomedical Sciences Research Center Al.  
15 Fleming, Vari, Greece

16 <sup>2</sup>Department of Hygiene and Epidemiology, University of Ioannina Medical School,  
17 Ioannina, Greece

18 <sup>3</sup>Department of Epidemiology and Biostatistics, Imperial College London, London, UK

19 <sup>4</sup>Dalla Lana School of Public Health, Toronto, ON, Canada

20 <sup>5</sup>Women's College Hospital, Toronto, ON, Canada

21 <sup>6</sup>Centre de recherche du Centre hospitalier de l'Université de Montréal and Institut du  
22 cancer de Montréal, Montreal, QC, Canada

23 <sup>7</sup>Department of Oncology, McGill University, Montreal, QC, Canada

24 <sup>8</sup>Lady Davis Institute, Montreal, QC, Canada

25 <sup>9</sup>Department of Medical Genetics, The Research Institute of the McGill University Health  
26 Centre, Montreal, QC, Canada

27 <sup>10</sup>Departments of Medicine & Human Genetics, McGill University; Cancer Research  
28 Program, The Research Institute of the McGill University Health Centre, Montreal, QC,  
29 Canada

30 <sup>11</sup>McGill University and Genome Quebec Innovation Centre, Montreal, QC, Canada

31 \* Corresponding authors  
32

33  
34 *Corresponding authors:*

35 Dr Antigone S. Dimas

36 [dimas@fleming.gr](mailto:dimas@fleming.gr)  
37

38 Dr Jiannis Ragoussis

39 [ioannis.ragoussis@mcgill.ca](mailto:ioannis.ragoussis@mcgill.ca)  
40

41 +Division of Pediatric Hematology/Oncology, First Department of Pediatrics, University  
42 of Athens, Aghia Sophia Children's Hospital, Athens Greece  
43

44

45 **Supplementary Note 1**

46 *Illumina TruSight cancer panel sequencing*

47 For initial screening of patients, the Illumina TruSight Cancer Panel was used to capture  
48 DNA regions of interest, following the manufacturer's instructions (Illumina, San Diego,  
49 USA). Indexed libraries were sequenced on an Illumina MiSeq platform using the  
50 Standard V2 kit (150 bp paired-end reads), while FASTQ, BAM and VCF files were  
51 generated through the Illumina MiSeq Reporter (Illumina, San Diego, USA). Genes and  
52 genomic regions targeted by the above panel can be found at:  
53 [http://www.illumina.com/documents/products/gene\\_lists/gene\\_list\\_trusight\\_cancer.xlsx](http://www.illumina.com/documents/products/gene_lists/gene_list_trusight_cancer.xlsx)  
54

55 **Supplementary Note 2**

56 *DNA exome capture and sequencing*

57 gDNA from patients who were negative for known breast cancer (BC) risk variants, or  
58 from informative relatives, was extracted from peripheral blood mononuclear cells  
59 (PBMCs) following standard salt extraction (Miller et al., 1988). Exome capture was  
60 performed on 1µg of gDNA per sample using the Ion Targetseq™ exome enrichment kit  
61 (50Mb target region) following the manufacturer's instructions (Thermo Fisher Scientific  
62 Inc., West Palm Beach, FL, USA). Enriched DNA from each individual was loaded on  
63 the Ion PI™ chip (v3) and sequenced on an Ion Proton (IP) platform (Thermo Fisher  
64 Scientific Inc., West Palm Beach, FL, USA). Seven samples (F12S01; F12S02; F12S03;  
65 F11S01; F11S02; F11S03; F11S04) were also sequenced on an Illumina platform for the  
66 purpose of comparison. For these samples, exome capture was performed on 3µg of  
67 gDNA using the SureSelect XT2 Human All Exon V5 kit (50Mb target region, Agilent  
68 Technologies, Inc., Santa Clara, CA, USA) followed by 100-bp paired-end sequencing  
69 on a HiSeq 2000 platform (Illumina, Inc., San Diego, CA, USA). Standard protocols by  
70 Agilent and Illumina were applied.  
71

72 *Variant calling and QC*

73 Germline variants (single nucleotide variants (SNVs) and indels) were called from IP raw  
74 sequence data using two software packages: the IP platform built-in Torrent Variant  
75 Caller (TVC v5.0) and the Genome Analyzer Toolkit (DePristo et al., 2011) (GATK).  
76 TVC-detected variants were called using the IP plug-in for TVC with default parameters.  
77 For GATK-called variants, prior to variant calling, raw data were trimmed using  
78 trimmomatic (v0.36) (Bolger et al., 2014). Trimmed reads were aligned against Ensembl  
79 GRCh37 using BWA-mem (v0.7.7-r441) (Li and Durbin, 2010) with default options.  
80 Duplicate reads were marked using the Picard toolkit (v1.109(1716)  
81 <https://broadinstitute.github.io/picard/>). GATK (v3.3-0-g37228af) best practices  
82 recommendations (Van der Auwera et al., 2013) were followed to call (HaplotypeCaller)  
83 and filter (VQSRL, tranche 99.5) variants. GATK was also used to call variants for the  
84 seven samples that were also sequenced on an Illumina platform. Variants with a depth  
85 of less than six reads or with GQ<20 were excluded from further analysis. We also  
86 excluded all GATK-called indels from the IP data, as these were found to have high false  
87 positive rates, in line with similar work (Zhang et al., 2015). TVC-called indels from IP  
88 data were retained. SNVs and indels passing QC filtering criteria were annotated  
89 functionally using Annovar (Wang et al., 2010). Given that CNV calling from exome data  
90 is noisy (Samarakoon et al., 2014), we retained for further analysis CNVs that were  
91 present in at least two relatives and were absent in all examined unrelated individuals.  
92 Due to differences in raw data manipulation, mapping and variant calling between the

93 two strategies employed (TVC and GATK), we sought to quantify the overlap between  
94 SNVs determined by each method. Additionally, for the seven samples sequenced on both  
95 the IP and Illumina platforms, we compared the overlap of SNVs and indels detected  
96 through the two different sequencing technologies.

97

### 98 **Supplementary Note 3**

#### 99 *Gene-based prioritization of HBOC candidate loci*

100 For the gene-based shortlisting approach we focused on genes that harbored LoF variants  
101 (stop-gain, essential splice site, and frameshift), given their higher functional prior  
102 (McClellan and King, 2010). We identified genes that contained the same LoF variant in  
103 at least two GRBC patients from a single family, or a LoF variant in a single patient when  
104 no additional affected family members were available. We limited our search to variants  
105 with minor allele frequency  $MAF \leq 0.1\%$  in both ALL 1000 Genomes and gnomAD. We  
106 then explored the presence, in FBRCAX patients, of rare LoF variants mapping in the  
107 genes prioritized as described above. We retained genes that harbored identical or  
108 different rare LoF variants in at least one FBRCAX patient and restricted our analysis to  
109 variants mapping on the same transcript. Genes were excluded from further analysis if  
110 LoF variants mapped to the last exon, as these are less likely to have a detrimental impact  
111 on gene function (Richards et al., 2015). We shortlisted as possible candidates for HBOC  
112 susceptibility genes that harbored at least one rare LoF variant in both GRBC and  
113 FBRCAX. We explored the presence of the FBRCAX-detected variants in an independent  
114 group of French-Canadian BC patients (CHUM-BC) and in control individuals  
115 (CARTaGENE).

116

### 117 **Supplementary Note 4**

#### 118 *Experimental validation of prioritized variants*

119 To experimentally validate GRBC variants shortlisted through gene and variant-based  
120 strategies, we re-sequenced a subset of 148 variants, using AmpliSeq (Thermo Fisher  
121 Scientific Inc., West Palm Beach, FL, USA). Briefly, the AmpliSeq web designer  
122 ([www.ampliseq.com/browse.action](http://www.ampliseq.com/browse.action)) was employed to design a primer pool targeting 148  
123 variants. Selected regions were amplified from 10ng of DNA using the Ion AmpliSeq  
124 library kit (Thermo Fisher Scientific Inc., West Palm Beach, FL, USA) and amplicons  
125 were sequenced on an IP platform. Seventeen of the 148 variants were shortlisted by both  
126 gene and variant-based prioritization approaches, and 131 variants were shortlisted  
127 through variant-based prioritization. The vast majority of variants chosen for validation  
128 have not been reported in public databases to date, or have  $MAF < 0.01\%$  (gnomAD). In  
129 FBRCAX candidate variants were genotyped through Sanger sequencing.

130

### 131 **Supplementary Note 5**

#### 132 *Genotyping of FBRCAX-detected variants in CHUM-BC and CARTaGENE*

133 Genotyping on the Sequenom iPLEX MassARRAY (Sequenom, Inc., San Diego, CA,  
134 USA) was performed to validate FBRCAX-detected variants in the two groups of French-  
135 Canadian individuals. We genotyped 512 female patients (CHUM-BC) and 1,940 cancer-  
136 free individuals (CARTaGENE, 970 female and 970 male). For CARTaGENE  
137 individuals, after excluding instances where genotyping failed, we obtained genotype  
138 information for 1,924 individuals (961 female and 963 male), and 1,919 individuals (958  
139 female, 961 male) for the *MDM1* and *NBEAL1* variants respectively.

140

141 **Supplementary Note 6**

142 *Variant allele frequencies in TCGA, ExAC and UKB*

143 TCGA contains whole exome sequence (WES) data from ~10,000 cancer patients,  
144 including 1,000 BC cases, the majority of whom are of Caucasian ancestry (Lu et al.,  
145 2015). We approximated allele frequencies of TCGA germline variants using information  
146 from ExAC (Lek et al., 2016). ExAC is a WES database of genetic variation from 60,706  
147 unrelated individuals, of whom 33,370 are of non-Finnish European (NFE) ancestry, from  
148 various disease and population studies. This database also includes WES data from 7,601  
149 TCGA cancer patients, with 6,197 patients being of NFE ancestry (NFE-TCGA). The  
150 ExAC-nonTCGA dataset is a subset of ExAC in which TCGA patients have been  
151 excluded. Individuals included in the ExAC-nonTCGA dataset are from studies on  
152 phenotypes other than cancer and were thus considered to be “cancer-free” individuals.  
153 We derived NFE-TCGA genotypes by subtracting NFE-ExAC-nonTCGA from NFE-  
154 ExAC variant counts, using vcftools. Only variants with the filter status “PASS” (derived  
155 from ExAC vcf info) were selected. Also, to ensure equal representation of data from  
156 NFE-TCGA and NFE-ExAC-nonTCGA, we restricted our analysis to loci that had  
157 genotype information available for over 80% of NFE individuals in ExAC. UKB contains  
158 genotype data for 337,218 unrelated individuals of European ancestry (EUR-UKB),  
159 including 57,398 cancer patients, of whom 10,982 were diagnosed with BC (Sudlow et  
160 al., 2015). We approximated allele frequencies for EUR-UKB cancer-free individuals by  
161 subtracting variant counts for 57,398 cancer patients from the total of 337,218 UKB  
162 individuals. We also approximated allele frequencies for EUR-UKB female cancer-free  
163 individuals by subtracting allele frequencies for 10,918 BC female patients from the total  
164 of 143,844 female individuals.

165  
166 **Supplementary Note 7**

167 *Variant-based prioritization of HBOC candidate loci*

168 For the variant-based shortlisting approach, we expanded the range of variant types  
169 examined in the gene-based approach to include in-frame indels, missense and stop-loss  
170 variants. For the Cancer Gene Variants (CGV) and Shared Variants/Genes in Unrelated  
171 (SVGU) strategies, we shortlisted variants with MAF<1%. Furthermore, missense  
172 variants were shortlisted if their effect was predicted to be damaging by at least one of  
173 seven prediction tools (SIFT; PolyPhen-HDIV; PolyPhen2-HVAR; LRT;  
174 MutationTaster; MutationAssessor; CADD). For the Family Specific Variants (FSV)  
175 strategy, we shortlisted variants with MAF<0.01% and damaging effects (for missense  
176 variants) as predicted by at least four of seven tools. Global population allele frequencies  
177 in 1000 Genomes and gnomAD, as well as pathogenicity prediction scores from the seven  
178 in silico tools, were assigned through Annovar. For CADD, a damaging effect was  
179 recorded for Phred scores >20. For the other tools, predictions were assigned by the  
180 software (SIFT, deleterious; PolyPhen-HDIV, probably damaging; PolyPhen2-HVAR,  
181 probably damaging; LRT, deleterious; MutationTaster, disease causing;  
182 MutationAssessor, high). For all strategies, only variants that were shared between  
183 affected relatives were considered. For SVGU we also required variants to be present in  
184 at least one unrelated patient.

185  
186 **Supplementary Note 8**

187 *Genes involved in cancer susceptibility and pathogenesis or in DNA repair*

188 A list of 1,580 genes with a known role in cancer susceptibility and pathogenesis or with  
189 a role in DNA repair was compiled using information from: a) the Cancer Gene Census  
190 (<http://www.sanger.ac.uk/science/data/cancer-gene-census>), b) a review article focused  
191 on cancer predisposing genes (CPGs) (Rahman, 2014), c) the KEGG pathway database  
192 (<http://www.genome.jp/kegg/pathway.html>), d) the Human Phenotype Ontology  
193 database ([human-phenotype-ontology.github.io](http://human-phenotype-ontology.github.io)), e) the Gene Ontology database  
194 ([www.geneontology.org](http://www.geneontology.org)), and f) three sequencing diagnostic panels for cancer  
195 predisposition (BROCA panel, <http://tests.labmed.washington.edu/BROCA>; TruSight  
196 cancer, [www.illumina.com](http://www.illumina.com); Qiagen cancer, [www.qiagen.com](http://www.qiagen.com)). Gene names are in  
197 Supplementary Table 2.

198

### 199 **Supplementary Note 9**

200 *Enrichment of GRBC prioritized variants in NFE-TCGA and EUR-UKB cancer patients*  
201 To explore whether variant-based prioritization candidates are enriched in cancer patients  
202 from TCGA and UKB, we compared allele frequencies between 6,197 NFE-TCGA  
203 cancer patients vs. 27,173 NFE-ExAC-nonTCGA cancer-free individuals for a total of  
204 1,844 shortlisted variants. For EUR-UKB, given the availability of genotype data from  
205 the Axiom Array (820,967 markers), we were able to query 791 out of 1,844 shortlisted  
206 variants (42.9%).

207

### 208 **Supplementary Note 10**

209 *Overlap of variants detected on IP vs. Illumina platforms*

210 For seven individuals (F12S01; F12S02; F12S03; F11S01; F11S02; F11S03; F11S04),  
211 sequenced on both IP and Illumina platforms, on average 85.7% of SNVs were detected  
212 by both sequencing technologies, whereas 5.5% and 8.8% of SNVs were detected only  
213 by the Illumina and the IP platform respectively. Note that for the IP platform we  
214 considered the union of TVC and GATK-called SNVs. Indel overlap, between IP (TVC-  
215 called) and Illumina (GATK-called) variants, was at 48.8%, in line with similar studies  
216 (Boland et al., 2013) (Supplementary Tables 7 and 8).

217

218 **Supplementary Figure 1.** Variant-based prioritization workflow.

219

220 **Supplementary Figure 2.** Somatic mutation and copy number alteration (CNA) spectrum  
221 of candidate genes *MDM1* and *NBEAL1*, and of known risk genes *BRCA1*, *BRCA2* and  
222 *TP53* in 816 TCGA patients. Figure adapted from cBioPortal analysis (Cerami et al.,  
223 2012; Gao et al., 2013).

224

225

### 226 **References**

227

228 Boland, J.F., Chung, C.C., Roberson, D., Mitchell, J., Zhang, X., Im, K.M., *et al.* (2013).

229 The new sequencer on the block: comparison of Life Technology's Proton

230 sequencer to an Illumina HiSeq for whole-exome sequencing. *Hum Genet* 132,

231 1153-1163.

232 Bolger, A.M., Lohse, M., and Usadel, B. (2014). Trimmomatic: a flexible trimmer for  
233 Illumina sequence data. *Bioinformatics* 30, 2114-2120.

234 Cerami, E., Gao, J., Dogrusoz, U., Gross, B.E., Sumer, S.O., Aksoy, B.A., *et al.* (2012).  
235 The cBio cancer genomics portal: an open platform for exploring  
236 multidimensional cancer genomics data. *Cancer Discov* 2, 401-404.

237 Depristo, M.A., Banks, E., Poplin, R., Garimella, K.V., Maguire, J.R., Hartl, C., *et al.*  
238 (2011). A framework for variation discovery and genotyping using next-  
239 generation DNA sequencing data. *Nat Genet* 43, 491-498.

240 Gao, J., Aksoy, B.A., Dogrusoz, U., Dresdner, G., Gross, B., Sumer, S.O., *et al.* (2013).  
241 Integrative analysis of complex cancer genomics and clinical profiles using the  
242 cBioPortal. *Sci Signal* 6, p11.

243 Lek, M., Karczewski, K.J., Minikel, E.V., Samocha, K.E., Banks, E., Fennell, T., *et al.*  
244 (2016). Analysis of protein-coding genetic variation in 60,706 humans. *Nature*  
245 536, 285-291.

246 Li, H., and Durbin, R. (2010). Fast and accurate long-read alignment with Burrows-  
247 Wheeler transform. *Bioinformatics* 26, 589-595.

248 Lu, C., Xie, M., Wendl, M.C., Wang, J., McClellan, M.D., Leiserson, M.D., *et al.* (2015).  
249 Patterns and functional implications of rare germline variants across 12 cancer  
250 types. *Nat Commun* 6, 10086.

251 McClellan, J., and King, M.C. (2010). Genetic heterogeneity in human disease. *Cell* 141,  
252 210-217.

253 Miller, S.A., Dykes, D.D., and Polesky, H.F. (1988). A simple salting out procedure for  
254 extracting DNA from human nucleated cells. *Nucleic Acids Res* 16, 1215.

255 Rahman, N. (2014). Realizing the promise of cancer predisposition genes. *Nature* 505,  
256 302-308.

257 Richards, S., Aziz, N., Bale, S., Bick, D., Das, S., Gastier-Foster, J., *et al.* (2015).  
258 Standards and guidelines for the interpretation of sequence variants: a joint  
259 consensus recommendation of the American College of Medical Genetics and  
260 Genomics and the Association for Molecular Pathology. *Genet Med* 17, 405-424.

261 Samarakoon, P.S., Sorte, H.S., Kristiansen, B.E., Skodje, T., Sheng, Y., Tjonnfjord, G.E.,  
262 *et al.* (2014). Identification of copy number variants from exome sequence data.  
263 *BMC Genomics* 15, 661.

264 Sudlow, C., Gallacher, J., Allen, N., Beral, V., Burton, P., Danesh, J., *et al.* (2015). UK  
265 biobank: an open access resource for identifying the causes of a wide range of  
266 complex diseases of middle and old age. *PLoS Med* 12, e1001779.

267 Van Der Auwera, G.A., Carneiro, M.O., Hartl, C., Poplin, R., Del Angel, G., Levy-  
268 Moonshine, A., *et al.* (2013). From FastQ data to high confidence variant calls:  
269 the Genome Analysis Toolkit best practices pipeline. *Curr Protoc Bioinformatics*  
270 43, 11 10 11-33.

271 Wang, K., Li, M., and Hakonarson, H. (2010). ANNOVAR: functional annotation of  
272 genetic variants from high-throughput sequencing data. *Nucleic Acids Res* 38,  
273 e164.

274 Zhang, G., Wang, J., Yang, J., Li, W., Deng, Y., Li, J., *et al.* (2015). Comparison and  
275 evaluation of two exome capture kits and sequencing platforms for variant calling.  
276 *BMC Genomics* 16, 581.
